# Supplementary material for: CTCF orchestrates the germinal centre transcriptional program and prevents premature plasma cell differentiation
Source: PubMed Central journal article supplement (PMC5504274; doi:10.1038/ncomms16067), 2017-07-05
Supplement: ncomms16067-s1.pdf [file ncomms16067-s1.pdf]

Title of file for HTML: Supplementary Information

Description: Supplementary Figures and Table.

Title of file for HTML: Supplementary Data 1

Description: List of genes differentially expressed between CTCFfl/fl and CTCFfl/+ hCD2+ sorted B cells stimulated for 48h in the presence of antiCD3/antiCD28 and T cells

Title of file for HTML: Supplementary Data 2

Description: List of genes differentially expressed between CTCFfl/fl and CTCFfl/+ hCD2+ sorted B cells stimulated for 48h in the presence of LPS/IL4

Title of file for HTML: Peer Review File

Description:

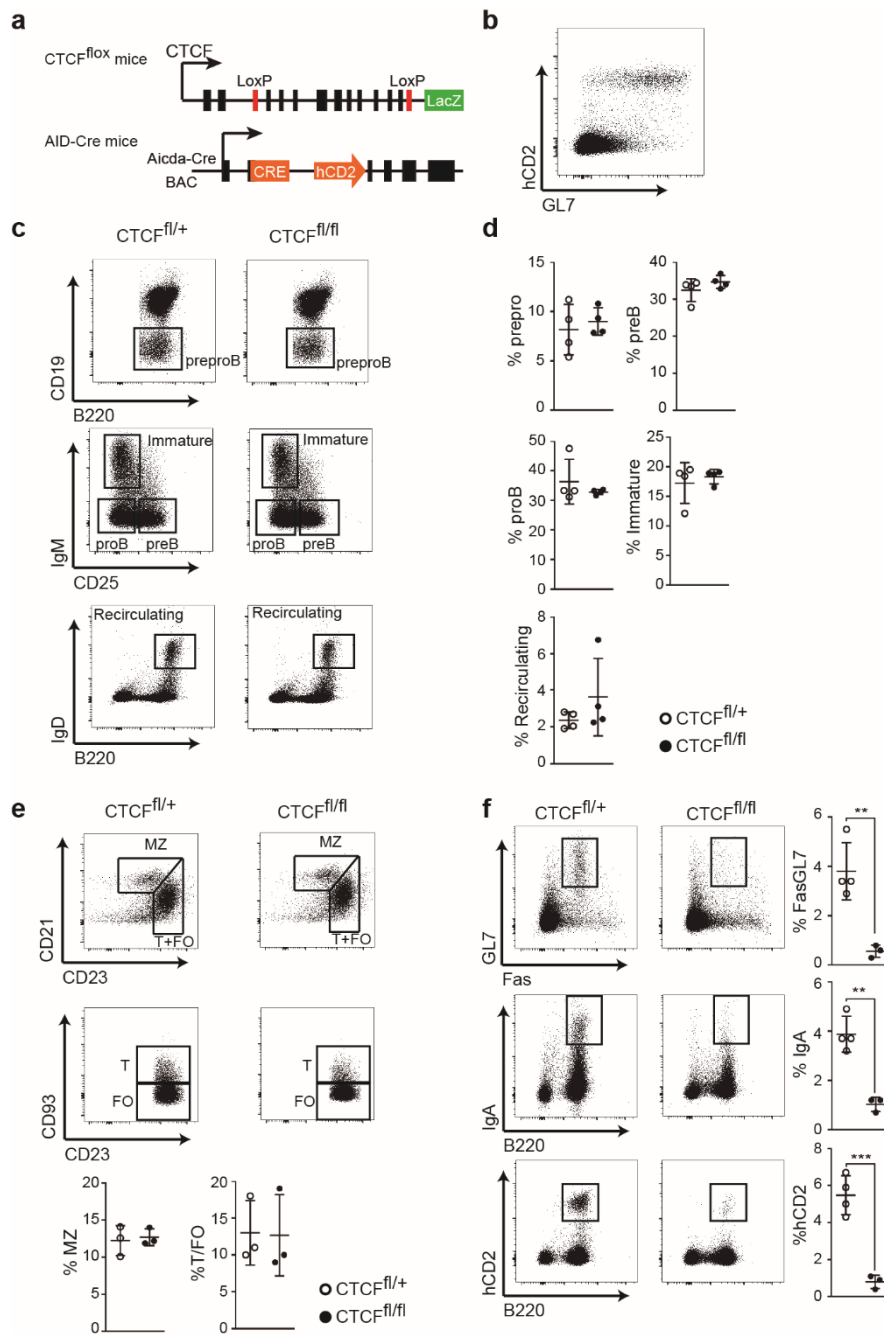

**Supplementary Figure 1. B cell differentiation and constitutive GC in CTCF deficient mice.** A) Representation of the constructs used for conditional depletion of CTCF in GC B cells. Mice carrying the CTCF allele flanked by LoxP sites (top) were bred to transgenic AID-CRE mice (bottom), where a cassette encoding for Cre recombinase and the hCD2 receptor is inserted in an AID-BAC. B) FACS analysis of hCD2 expression in Peyer's Patch B cells from CTCF<sup>fl/fl</sup> mice. C) FACS analysis of B cell differentiation in bone marrow. Populations were defined as follows: preproB (B220<sup>+</sup> CD19<sup>-</sup>); proB (B220<sup>+</sup>CD19<sup>+</sup>CD25<sup>-</sup>IgM<sup>-</sup>); preB (B220<sup>+</sup>CD19<sup>+</sup>CD25<sup>+</sup>IgM<sup>-</sup>); Immature (B220<sup>+</sup>CD19<sup>+</sup>CD25<sup>+</sup>IgM<sup>+</sup>); Recirculating (B220<sup>+</sup>CD19<sup>+</sup>IgD<sup>+</sup>). D) Quantification of the bone marrow populations shown in (C). Absolute numbers are shown in Supplementary Table 1. E) FACS analysis of B cell differentiation in spleen. B cell populations were defined as follows: Transitional (T: B220<sup>+</sup>CD21<sup>+</sup>CD23<sup>++</sup>CD93<sup>-</sup>); Marginal Zone (MZ: B220<sup>+</sup>CD21<sup>++</sup> CD23<sup>+</sup>); Follicular (FO: B220<sup>+</sup>CD21<sup>+</sup>CD23<sup>++</sup>CD93<sup>+</sup>). Quantifications are shown on the right. Absolute numbers are shown in Supplementary Table 1. All population percentages are referred to total B220<sup>+</sup>. CTCF<sup>fl/+</sup>, white dots; CTCF<sup>fl/fl</sup>, black dots. F) FACS analysis of GL7, Fas, IgA and hCD2 expression in Peyer's Patches B cells from CTCF<sup>fl/+</sup> (n=4) and CTCF<sup>fl/fl</sup> (n=3) mice. Plots are gated on B220<sup>+</sup> cells (top) or on total live lymphocytes (middle and bottom). Quantifications are shown on the right, as percentages within B220<sup>+</sup> cells. p(FasGL7)= 0.0056; p(IgA)= 0.0015; p(hCD2)= 0.0008. Statistical analysis was done by two-tailed unpaired Student's *t* test.

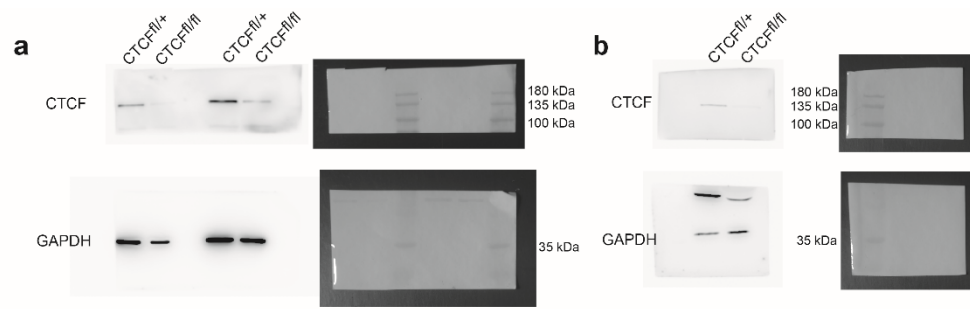

**Supplementary Figure 2. Uncropped western blots.** A) Western blot analysis of CTCF and GAPDH in isolated hCD2<sup>+</sup> B cells from CTCF<sup>fl/+</sup> and CTCF<sup>fl/fl</sup> mice after 72 hours of LPS/IL4 stimulation. B) Western blot analysis of CTCF and GAPDH in isolated hCD2<sup>+</sup> B cells from CTCF<sup>fl/+</sup> and CTCF<sup>fl/fl</sup> mice after 72 hours of stimulation in CD3/CD28 T-B co-cultures.

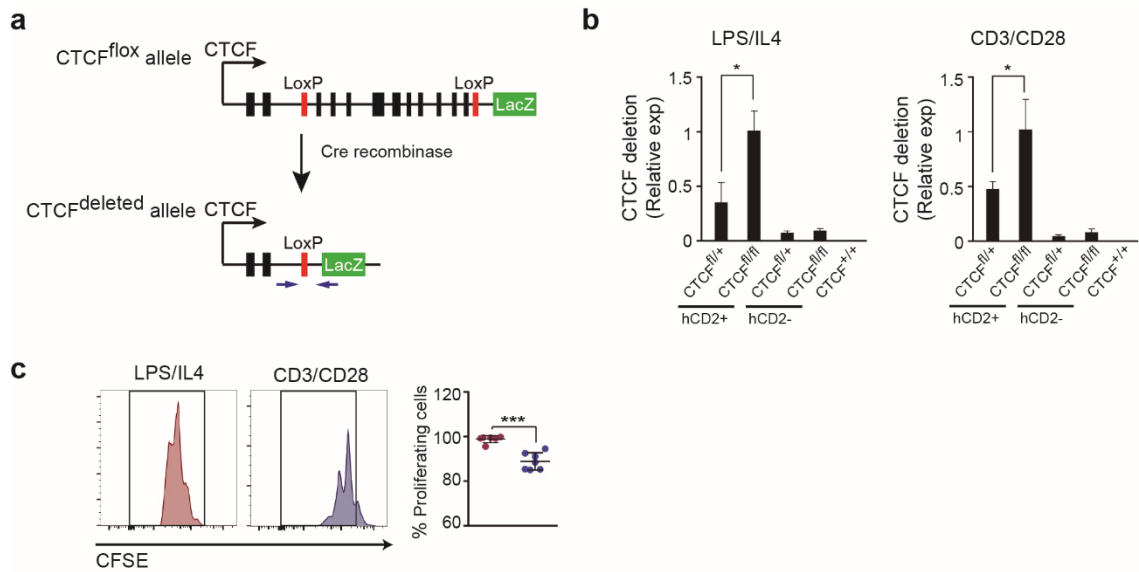

**Supplementary Figure 3. Analysis of CTCF deletion and comparison of proliferation between LPS/IL4 and CD3/CD28 stimulated B cells.** A) Representation of the strategy used for detection of CTCF<sup>fl</sup> allele deletion by qPCR. Upper, CTCF<sup>fl</sup> allele before Cre-mediated recombination. Lower, CTCF<sup>fl</sup> allele after Cre-mediated recombination. Blue arrows represent primers used in the PCR. B) qPCR analysis of CTCF deletion in hCD2<sup>+</sup> and hCD2<sup>-</sup> cells from CTCF<sup>fl/+</sup> (n=3) and CTCF<sup>fl/fl</sup> (n=3) mice after 48h of stimulation with LPS/IL4 (right panel) or CD3/CD28 and T cells (left panel). p(LPS/IL4)= 0,0112; p(CD3/CD28)= 0,0283. C) CFSE staining of hCD2<sup>+</sup> spleen B cells from CTCF<sup>fl/+</sup> (n=5) and CTCF<sup>fl/fl</sup> (n=7) mice after 72h of stimulation with LPS/IL4 or CD3/CD28 and T cells. Quantifications are shown on the right as percentages within B220<sup>+</sup>CD2<sup>+</sup> cells. p<0.0001. Numbers indicate percentages  $\pm$  Standard Deviation. Statistical analysis was done by two-tailed unpaired Student's *t* test.

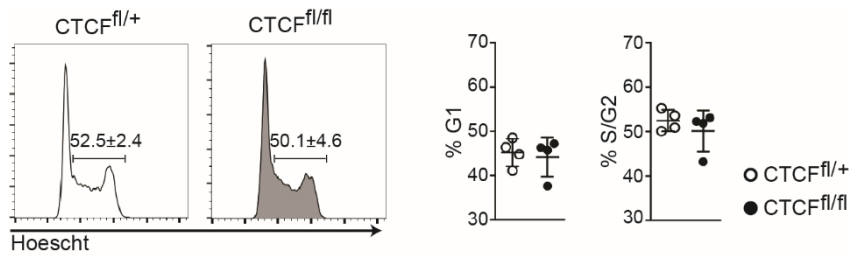

**Supplementary Figure 4. RNA-seq analysis of LPS/IL4 and CD3/CD28 stimulated B cells.** A) Gating strategy and post-sort analysis for selection of B cells used in RNA-seq experiments. CTCF<sup>fl/+</sup> and CTCF<sup>fl/fl</sup> B cells stimulated for 48h hours either in the presence of LPS/IL4 or in the presence of CD3/CD28 T stimulation were sorted as DAPI<sup>-</sup>, B220<sup>+</sup>, hCD2<sup>+</sup> cells. Representative pre- and post-sort plots of B cells stimulated with CD3/CD28 T cells are shown. B) Heatmap analysis of RNA-seq data of cell cycle-related genes. Cell cycle genes (484) were chosen using GO Enrichment Analysis. Z-scores for resting, GC, LPS/IL4 and CD3/D28 stimulated B cells are represented. Clustering was performed using the average linkage method based on Pearson correlation distance. Each column shows an independent replicate.

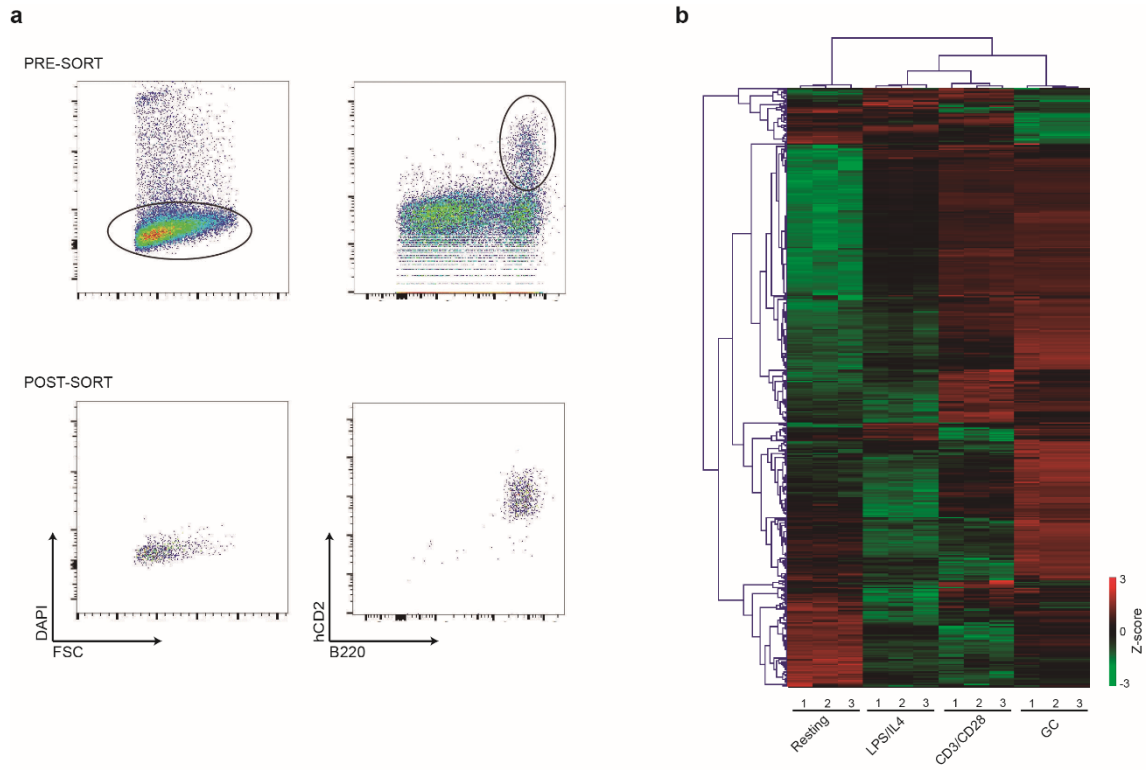

**Supplementary Figure 5. Cell cycle analysis in LPS/IL4 stimulated B cells.** FACS cell cycle analysis of hCD2<sup>+</sup> cells from CTCF<sup>fl/+</sup> (n=4) and CTCF<sup>fl/fl</sup> (n=4) mice after 48h of stimulation with LPS/IL4. Numbers indicate percentages  $\pm$  Standard Deviation. Quantification of G1 and S/G2 phase proportions is shown on the right.

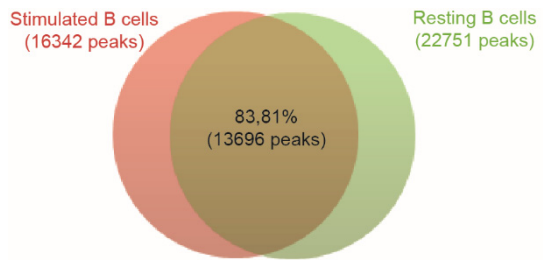

**Supplementary Figure 6. Comparison of CTCF binding in LPS/IL4 stimulated and naïve B cells.** ChIP-seq analysis of CTCF binding peaks in stimulated B cells and resting B cells from GSE43594<sup>1</sup>. Overlap of common peaks are depicted as Venn diagram.

| Subset               | Tissue                   | Cell number          |                       |
|----------------------|--------------------------|----------------------|-----------------------|
|                      |                          | CTCF <sup>fl/+</sup> | CTCF <sup>fl/fl</sup> |
| <b>PreproB</b>       | Bone marrow <sup>a</sup> | 0,95±0,20            | 1,24±0,13             |
| <b>ProB</b>          | Bone marrow <sup>a</sup> | 3,78±0,39            | 4,12±0,19             |
| <b>PreB</b>          | Bone marrow <sup>a</sup> | 3,60±0,68            | 4,36±0,28             |
| <b>Immature</b>      | Bone marrow <sup>a</sup> | 1,96±0,42            | 2,28±0,33             |
| <b>Recirculating</b> | Bone marrow <sup>a</sup> | 0,70±0,11            | 1,37±0,51             |
| <b>Mature</b>        | Spleen <sup>b</sup>      | 3,48±1,38            | 3,72±1,39             |
| <b>Follicular</b>    | Spleen <sup>b</sup>      | 1,91±0,70            | 2,14±0,82             |
| <b>Transitional</b>  | Spleen <sup>b</sup>      | 0,23±0,06            | 0,27±0,10             |
| <b>Marginal zone</b> | Spleen <sup>b</sup>      | 0,45±0,21            | 0,45±0,16             |

a: cell number  $\times 10^5 \pm \text{SEM}$

b: cell number  $\times 10^7 \pm \text{SEM}$

**Supplementary Table 1.** Absolute cell number of bone marrow and splenic B cell subsets in CTCF<sup>fl/+</sup> and CTCF<sup>fl/fl</sup> mice.



## SUPPLEMENTARY REFERENCE

1. Thomas-Claudepierre AS, Schiavo E, Heyer V, Fournier M, Page A, Robert I, *et al.* The cohesin complex regulates immunoglobulin class switch recombination. *The Journal of experimental medicine* 2013, **210**(12): 2495-2502.
